# Supplementary material for: Metabolic Alterations in Mothers Living with HIV and Their HIV-Exposed, Uninfected Infants
Source: MDPI journal article supplement (doi:10.3390/v16020313), 2024-02-19
Supplement: s1 [file s1]

# Supplementary Information

Supplementary Table S1: Demographic and clinical characteristics of infants exposed and unexposed to HIV at 6 and 10 weeks and 6 months. These data demonstrate the sensitivity analysis of infants who were exclusively breastfed at these time points.

| Time point               | 6 weeks               |                       |               | 10 weeks              |                       |               | 6 months              |                       |               |
|--------------------------|-----------------------|-----------------------|---------------|-----------------------|-----------------------|---------------|-----------------------|-----------------------|---------------|
| Group                    | HEU<br>(n = 21)       | HUU<br>(n = 30)       | p-value       | HEU<br>(n = 18)       | HUU<br>(n = 30)       | p-value       | HEU<br>(n = 16)       | HUU<br>(n = 22)       | p-value       |
| Weight (kg)              | 4.1<br>(3.8 – 4.7)    | 4.6<br>(4.1 – 4.9)    | <b>0.0386</b> | 5.1<br>(4.8 – 5.7)    | 5.4<br>(4.9 – 5.8)    | 0.2511        | 7.0<br>(6.7 – 7.6)    | 7.4<br>(7.0 – 7.8)    | 0.1628        |
| Length (cm)              | 54.3<br>(52.6 – 55.5) | 53.6<br>(52.5 – 56.0) | 0.8406        | 59.2<br>(56.0 – 60.0) | 57.2<br>(56.4 – 58.6) | 0.2275        | 65.4<br>(62.4 – 68.0) | 66.4<br>(64.0 – 68.0) | 0.5699        |
| BMI (kg/m <sup>2</sup> ) | 13.9 ± 2.1            | 15.5 ± 1.6            | <b>0.0083</b> | 15.1 ± 2.1            | 16.6 ± 2.1            | <b>0.0246</b> | 16.6 ± 0.9            | 17.2 ± 1.9            | 0.3144        |
| HC (cm)                  | 37.8<br>(36.8 – 38.3) | 38.0<br>(37.4 – 39.0) | 0.0894        | 39.1<br>(39.0 – 40.0) | 39.6<br>(39.0 – 40.2) | 0.7321        | 44.0<br>(43.0 – 44.0) | 43.0<br>(42.0 – 44.0) | 0.2732        |
| MUAC                     | 12.9<br>(12.3 – 13.0) | 13.0<br>(12.7 – 14.0) | 0.1161        | 13.8<br>(13.0 – 15.0) | 13.7<br>(13.0 – 15.0) | 0.9049        | 14.0<br>(14.0 – 14.2) | 15.0<br>(14.0 – 16.0) | <b>0.0125</b> |
| WHZ                      | -0.7<br>(-1.7 – 0.7)  | 0.4<br>(-0.3 – 1.7)   | <b>0.0186</b> | -0.4<br>(-1.0 – 0.3)  | 0.5 ± 1.9             | <b>0.0303</b> | -0.1<br>(-0.6 – 0.3)  | 0.0<br>(-0.6 – 0.6)   | 0.4171        |
| WAZ                      | -0.8 ± 1.7            | 0.1 ± 1.3             | 0.0607        | -0.7 ± 1.5            | 0.0<br>(-0.6 – 0.6)   | 0.1466        | -0.8 ± 0.9            | -0.2 ± 1.0            | 0.0717        |
| HAZ                      | -0.4<br>(-1.5 – 0.9)  | -0.4<br>(-1.2 – 0.1)  | 0.9694        | 0.2<br>(-1.3 – 0.9)   | -0.5<br>(-1.1 – 0.4)  | 0.5239        | -0.9<br>(-2.1 – 0.6)  | -0.5<br>(-1.0 – 0.7)  | 0.4171        |
| BAZ                      | -0.8<br>(-1.6 – 0.4)  | 0.6<br>(-0.2 – 1.0)   | <b>0.0163</b> | -0.5<br>(-0.9 – 0.1)  | 0.6<br>(-0.7 – 0.9)   | <b>0.0154</b> | -0.3<br>(-0.8 – 0.1)  | -0.0<br>(-0.7 – 0.5)  | 0.3144        |
| HCZ                      | 0.5<br>(-0.4 – 1.5)   | 0.7<br>(0.1 – 1.5)    | 0.1980        | 0.5<br>(-0.4 – 1.1)   | 0.5 (0.1 – 1.1)       | 0.6406        | 0.6<br>(-0.3 – 0.9)   | 0.5<br>(-0.7 – 0.6)   | 0.4752        |
| MUACZ                    |                       |                       |               |                       |                       |               | 0.1<br>(-0.2 – 0.3)   | 1.0<br>(0.2 – 1.8)    | <b>0.0155</b> |

All results are shown as median values with interquartile ranges (IQRs) for skewed distributions or mean values with ± standard deviation (SD) for normal distributions. Where cells are shaded, the parameters are not applicable to the group. Abbreviations: HEU: HIV-exposed uninfected, HUU: HIV-unexposed uninfected, kg: kilograms, cm: centimeters, BMI: body mass index, HC: head circumference, MUAC: mid-upper arm circumference, WHZ: weight-for-length z-score, WAZ: weight-for-age z-score, HAZ: height-for-age z-score, BAZ: BMI-for-age z-score, HCZ: head circumference z-score, MUACZ: mid-upper arm circumference z-score.

Supplementary Table S2: Metabolomics data of pregnant women living with HIV and HIV-uninfected pregnant women at 28 weeks' gestation.

| Time point               | 28 weeks' gestation      |                            |               |
|--------------------------|--------------------------|----------------------------|---------------|
| Group                    | PWLWH<br>(n = 29)        | HIV-uninfected<br>(n = 31) | p-value       |
| 3-hydroxybutyric acid    | 43.8 (28.5 – 59.3)       | 61.8 (41.8 – 118.8)        | <b>0.0351</b> |
| 3-Hydroxyisobutyric acid | 8.6 (5.4 – 11.8)         | 10.8 (6.8 – 14.3)          | 0.2007        |
| 3-Hydroxyisovaleric acid | 4.3 (2.8 – 5.6)          | 4.2 (3.1 – 6.4)            | 0.6733        |
| Acetic acid              | 34.7 (23.6 – 48.3)       | 44.9 (29.8 – 54.9)         | <b>0.0377</b> |
| Acetoacetic acid         | 17.6 (13.2 – 23.2)       | 25.6 (15.1 – 58.7)         | <b>0.0241</b> |
| Acetone                  | 3.2 (2.3 – 5.4)          | 5.5 (2.2 – 10.5)           | 0.0848        |
| Betaine                  | 93.1 (81.6 – 113.3)      | 94.9 (79.6 – 105.0)        | 0.6733        |
| CA-EDTA                  | 2682.1 (2384.2 – 2880.9) | 2694.2 (2440.6 – 2944.9)   | 0.7393        |
| Creatinine               | 46.0 (36.4 – 57.9)       | 50.7 (39.9 – 58.2)         | 0.3708        |
| Formic acid              | 23.1 (15.2 – 40.1)       | 22.4 (15.3 – 32.6)         | 0.8186        |
| Glucose                  | 1606.3 (1274.7 – 1904.2) | 1468.4 (1298.8 – 1762.8)   | 0.5104        |
| Glycine                  | 226.4 (181.1 – 278.3)    | 228.4 (176.3 – 253.8)      | 0.7730        |
| Hypoxanthine             | 12.8 (7.6 – 18.1)        | 7.4 (4.1 – 21.8)           | 0.1451        |
| Myo-inositol             | 92.1 (63.6 – 113.8)      | 85.2 (58.5 – 118.0)        | 0.9705        |
| Taurine                  | 1794.1 (1526.7 – 2009.1) | 1688.8 (1524.0 -1982.1)    | 0.5296        |
| Threonine                | 190.0 (79.4 – 253.5)     | 173.6 (119.0 – 219.2)      | 0.8072        |
| Tyrosine                 | 45.4 (25.1 – 61.3)       | 44.8 (33.5 – 57.9)         | 0.9943        |
| Valine                   | 126.5 (107.3 – 162.8)    | 136.8 (120.7 – 174.2)      | 0.1905        |

All results are shown as median values with interquartile ranges (IQRs) for skewed distributions. Abbreviations: PWLWH: pregnant women living with HIV.

Supplementary Table S3: Metabolomics data of infants exposed and unexposed to HIV at birth.

| Group                    | HEU<br>(n = 29)          | HUU<br>(n = 31)          | p-value       |
|--------------------------|--------------------------|--------------------------|---------------|
| 3-Hydroxybutyric acid    | 235.9 (136.5 – 440.6)    | 217.7 (118.9 – 307.5)    | 0.5645        |
| 3-Hydroxyisobutyric acid | 15.8 (12.4 – 25.3)       | 16.3 (9.9 – 22.0)        | 0.5748        |
| 3-Hydroxyisovaleric acid | 3.9 (12.4 – 25.3)        | 5.5 (2.6 – 7.9)          | 0.2684        |
| Acetic acid              | 44.2 (38.9 – 49.8)       | 47.3 (38.7 – 55.9)       | 0.2619        |
| Acetoacetic acid         | 24.9 (18.5 – 50.9)       | 26.4 (18.8 – 43.0)       | 0.6934        |
| Acetone                  | 21.6 (6.7 – 43.6)        | 12.0 (7.4 – 17.7)        | 0.3710        |
| Betaine                  | 91.4 (80.7 – 106.6)      | 98.1 (78.4 – 116.9)      | 0.3472        |
| CA-EDTA                  | 2783.3 (2561.7 – 2915.0) | 2706.8 (2435.3 – 3164.5) | 0.6062        |
| Creatinine               | 77.5 (64.5 – 112.9)      | 91.0 (76.6 – 119.0)      | 0.1541        |
| Formic acid              | 32.8 (16.8 – 52.1)       | 19.6 (13.2 – 24.7)       | <b>0.0500</b> |
| Glucose                  | 948.6 (635.1 – 1450.7)   | 1035.2 (709.5 – 1374.2)  | 0.4043        |
| Glycine                  | 325.4 (279.9 – 391.7)    | 363.1 (295.8 – 460.6)    | 0.2555        |
| Hypoxanthine             | 13.5 (9.6 – 23.0)        | 17.3 (9.8 – 26.9)        | 0.4043        |
| Myo-inositol             | 196.7 (151.9 – 238.0)    | 252.0 (193.2 – 307.6)    | <b>0.0500</b> |
| Taurine                  | 1343.6 (923.2 – 1680.9)  | 1570.3 (1014.1 – 1810.0) | 0.2885        |
| Threonine                | 218.3 (170.9 – 277.5)    | 293.5 (245.4 – 351.3)    | <b>0.0076</b> |
| Tyrosine                 | 79.4 (65.0 – 90.7)       | 78.0 (61.5 – 99.6)       | 0.6062        |
| Valine                   | 217.2 (178.2 – 248.4)    | 223.8 (187.2 – 262.3)    | 0.4304        |

All results are shown as median values with interquartile ranges (IQRs) for skewed distributions. Abbreviations: HEU: HIV-exposed uninfected, HUU: HIV-unexposed uninfected.

Supplementary Table S4: Metabolomics data of infants exposed and unexposed to HIV at 6/10 weeks.

| Group                    | HEU<br>(n = 29)          | HUU<br>(n = 31)          | p-value       |
|--------------------------|--------------------------|--------------------------|---------------|
| 3-Hydroxybutyric acid    | 61.5 (42.1 – 77.6)       | 62.9 (51.4 – 90.7)       | 0.5491        |
| 3-Hydroxyisobutyric acid | 14.0 (10.6 – 15.6)       | 12.2 (6.7 – 15.3)        | 0.3253        |
| 3-Hydroxyisovaleric acid | 3.6 (2.1 – 5.1)          | 2.8 (1.5 – 4.3)          | 0.4640        |
| Acetic acid              | 48.5 (37.2 – 65.4)       | 54.3 (44.2 – 78.4)       | 0.4374        |
| Acetoacetic acid         | 16.7 (12.8 – 22.1)       | 23.0 (12.3 – 27.8)       | 0.2769        |
| Acetone                  | 5.5 (3.9 – 10.7)         | 5.2 (3.2 – 9.8)          | 0.4374        |
| Betaine                  | 143.0 (108.2 – 164.3)    | 162.5 (148.1 – 213.6)    | <b>0.0176</b> |
| CA-EDTA                  | 2582.1 (2383.6 – 2850.2) | 2801.8 (2490.5 – 3093.1) | 0.1186        |
| Creatinine               | 91.7 (75.4 – 116.5)      | 98.2 (74.3 – 113.7)      | 0.9117        |
| Formic acid              | 97.7 (59.3 – 143.9)      | 90.5 (57.9 – 121.2)      | 0.6626        |
| Glucose                  | 1550.3 (1270.9 – 1790.8) | 1570.9 (1413.2 – 1973.7) | 0.3868        |
| Glycine                  | 332.3 (290.2 – 362.8)    | 286.3 (239.3 – 348.0)    | 0.0723        |
| Hypoxanthine             | 12.6 (6.1 – 20.4)        | 14.9 (9.7 – 20.3)        | 0.7843        |
| Myo-inositol             | 212.7 (131.5 – 262.6)    | 217.6 (154.9 – 275.3)    | 0.4287        |
| Taurine                  | 1878.7 (1659.2 – 2129.0) | 2049.9 (1714.4 – 2281.3) | 0.2970        |
| Threonine                | 216.6 (135.6 – 279.1)    | 203.0 (127.9 – 279.6)    | 0.8186        |
| Tyrosine                 | 94.9 (76.9 – 135.9)      | 134.1 (94.4 – 151.7)     | <b>0.0483</b> |
| Valine                   | 178.5 (141.1 – 216.5)    | 196.2 (151.3 – 224.3)    | 0.6842        |

All results are shown as median values with interquartile ranges (IQRs) for skewed distributions. Abbreviations: HEU: HIV-exposed uninfected, HUU: HIV-unexposed uninfected.

Supplementary Table S5: Metabolomics data of infants exposed and unexposed to HIV at 6 months.

| Group                    | HEU<br>(n = 29)          | HUU<br>(n = 31)          | p-value       |
|--------------------------|--------------------------|--------------------------|---------------|
| 3-Hydroxybutyric acid    | 79.9 (60.2 – 129.6)      | 86.0 (71.1 – 190.8)      | 0.3065        |
| 3-hydroxyisobutyric acid | 12.7 (6.9 – 14.3)        | 15.3 (7.1 – 18.2)        | <b>0.0390</b> |
| 3-Hydroxyisovaleric acid | 4.0 (1.7 – 6.0)          | 4.2 (2.6 – 6.2)          | 0.3645        |
| Acetic acid              | 44.3 (35.5 – 54.4)       | 39.1 (30.6 – 51.6)       | 0.5758        |
| Acetoacetic acid         | 18.9 (12.6 – 24.4)       | 19.3 (14.7 – 24.7)       | 0.6854        |
| Acetone                  | 5.8 (3.2 – 7.4)          | 9.0 (2.4 – 16.6)         | 0.1534        |
| Betaine                  | 154.6 (92.2 – 200.4)     | 164.5 (123.0 – 212.6)    | 0.3853        |
| CA-EDTA                  | 2868.8 (2497.7 – 3023.7) | 2681.9 (2564.5 – 3142.1) | 0.6296        |
| Creatinine               | 101.0 (76.0 – 120.3)     | 102.5 (81.7 – 120.1)     | 0.8020        |
| Formic acid              | 66.6 (38.6 – 90.4)       | 60.2 (41.5 – 102.4)      | 0.9079        |
| Glucose                  | 1366.5 (1025.9 – 1717.6) | 1480.4 (1351.4 – 1730.3) | 0.4286        |
| Glycine                  | 324.6 (292.6 – 371.3)    | 264.3 (230.6 – 323.3)    | <b>0.0078</b> |
| Hypoxanthine             | 12.6 (9.5 – 25.1)        | 11.8 (7.0 – 17.0)        | 0.3960        |
| Myo-inositol             | 133.9 (96.3 – 222.6)     | 130.1 (104.7 – 166.2)    | 0.7723        |
| Taurine                  | 1690.4 (1324.6 – 2117.1) | 1775.1 (1551.1 – 2114.3) | 0.6854        |
| Threonine                | 194.3 (134.0 – 303.8)    | 194.0 (135.7 – 283.7)    | 0.6572        |
| Tyrosine                 | 81.1 (67.5 – 100.8)      | 82.7 (62.8 – 123.4)      | 0.8621        |
| Valine                   | 167.3 (134.7 – 229.7)    | 197.6 (143.8 – 246.0)    | 0.6296        |

All results are shown as median values with interquartile ranges (IQRs) for skewed distributions. Abbreviations: HEU: HIV-exposed uninfected, HUU: HIV-unexposed uninfected.
